# Supplementary material for: Unravelling the mechanisms that determine the uptake and metabolism of magnetic single and multicore nanoparticles in aXenopus laevismodel
Source: Royal Society of Chemistry journal article supplement (doi:10.1039/c7nr06020c), 2017-12-08
Supplement: c7nr06020c1.pdf [file c7nr06020c1.pdf]

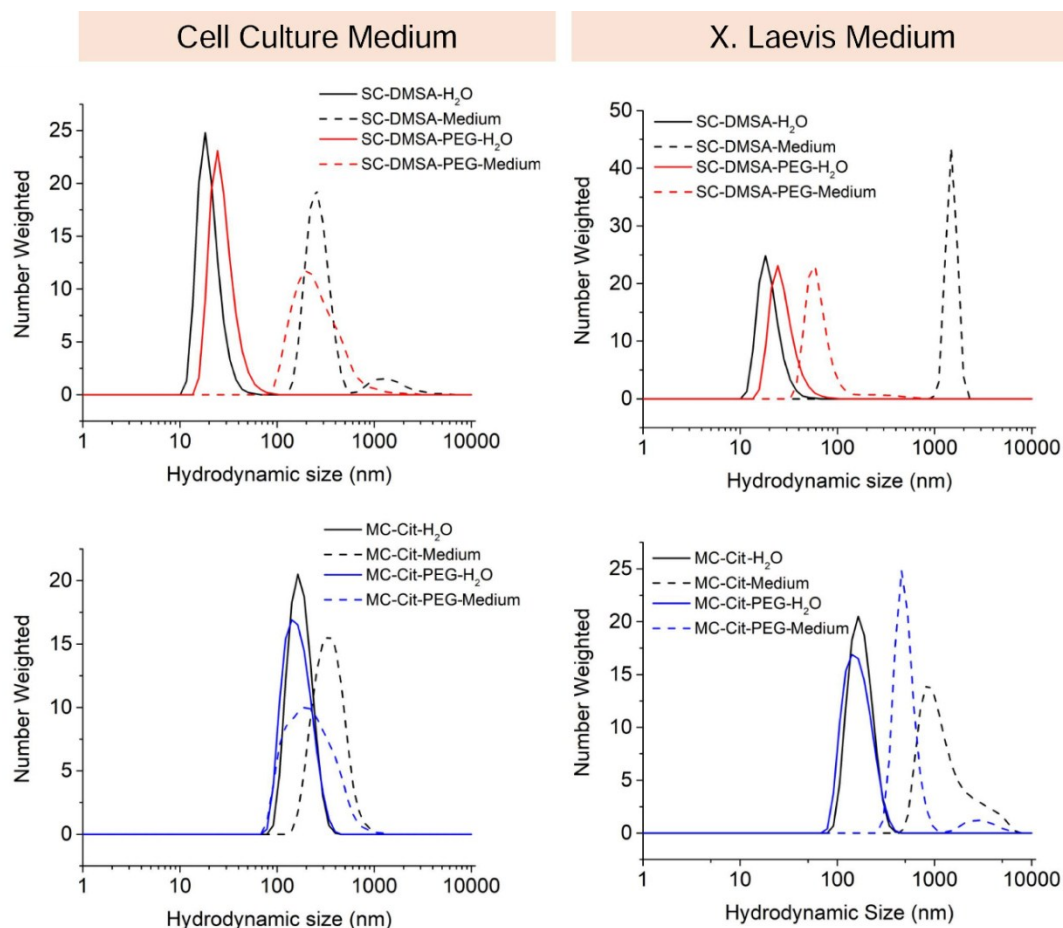

**Figure 15.** Colloidal properties of nanoparticles suspensions in different biological media.

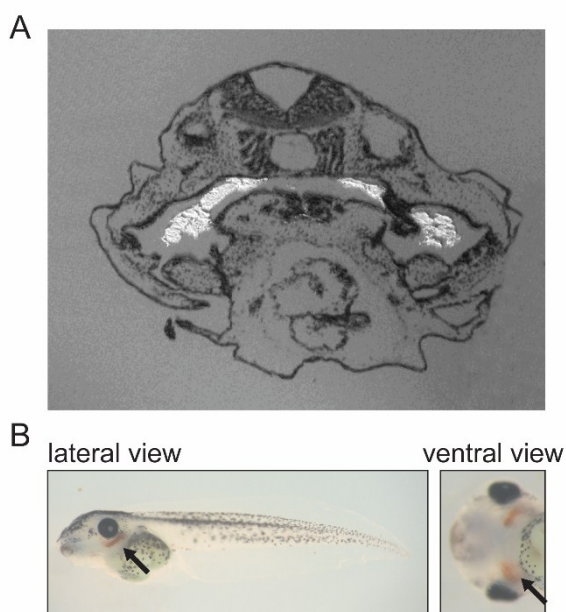

**Figure 25.** Detection of SC-DMSA (1 mg/mL) in the gills of the embryos after 72 h of exposure. (A) Scanning electron microscopy (SEM) images of gills sections. (B) Visual identification of IONPs deposition in the gills of the embryos (Black arrows).

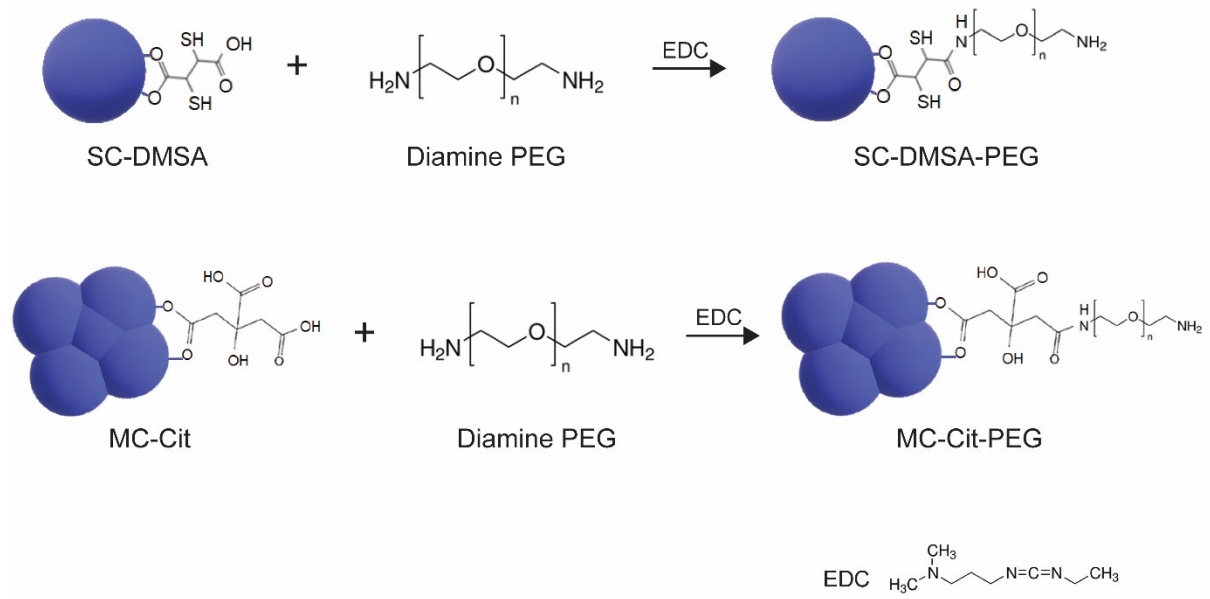

**Figure 3S.** Schematic representation of conjugation reaction of single and multicore nanoparticles with amine PEG derivatives in a reaction mediated by carbodiimide.
